# Supplementary material for: Zinc-α2-glycoprotein as an inhibitor of amine oxidase copper-containing 3
Source: Open Biol. 2020 Apr 22;10(4):190035. doi: 10.1098/rsob.190035 (PMC6685929; doi:10.1098/rsob.190035)
Supplement: ROS induces ZAG oligomerization [file rsob190035supp2.docx]

Supplemental Fig. 3 of “ZINC-α2-GLYCOPROTEIN IS AN INHIBITOR OF AMINE OXIDASE COPPER-CONTAINING 3”, Romauch M, Open Biology, 2019

**ROS induces ZAG oligomerization**

The difference in the effect of ZAG and LJP1586 on lipolysis at higher octopamine concentrations (Fig. 8) led to the idea that the inhibitory potential of ZAG is coregulated by side-product H2O2. To test this hypothesis, purified recombinant ZAG was incubated with and without recombinant AOC3, in the presence of H2O2 or benzylamine (Supplemental Fig. 1, A and B). Incubation with H2O2 led to a high molecular weight shift (*) in wt ZAG, irrespective of whether AOC3 was present or not. In contrast, addition of benzylamine (and AOC3 dependent production of H2O2) again led to a high molecular weight shift in wt ZAG, but only in the presence of AOC3. Interestingly, the various glycomutants did not show such behavior. Furthermore, separation of murine plasma by non-reducing SDS-PAGE revealed a very similar WB signal (Supplemental Fig. 1, C). This points to the possibility that H2O2, whether from AOC3 or not, could induce oligomerization of ZAG *in vitro* and *in vivo*, thereby affecting its biological function.

**Figure caption:**

**Supplemental Fig. 1** **A and B, WB:** Wt ZAG and its glycomutants were overexpressed in Expi293F cells and affinity purified using their GST-tags. ZAG (after GST removal) was incubated with and without recombinant AOC3, in the presence of H2O2 (A) or benzylamine (B). Samples were separated by non-reducing SDS-PAGE and proteins were probed using anti-ZAG antibody. **C, WB:** Plasma of a C57Bl6 wt mouse. Proteins were separated by non-reducing SDS-PAGE and proteins were probed using anti-ZAG antibody. Asterisks indicate a high molecular weight protein complex.

**Figures:**

**Supplemental Fig. 3**

***
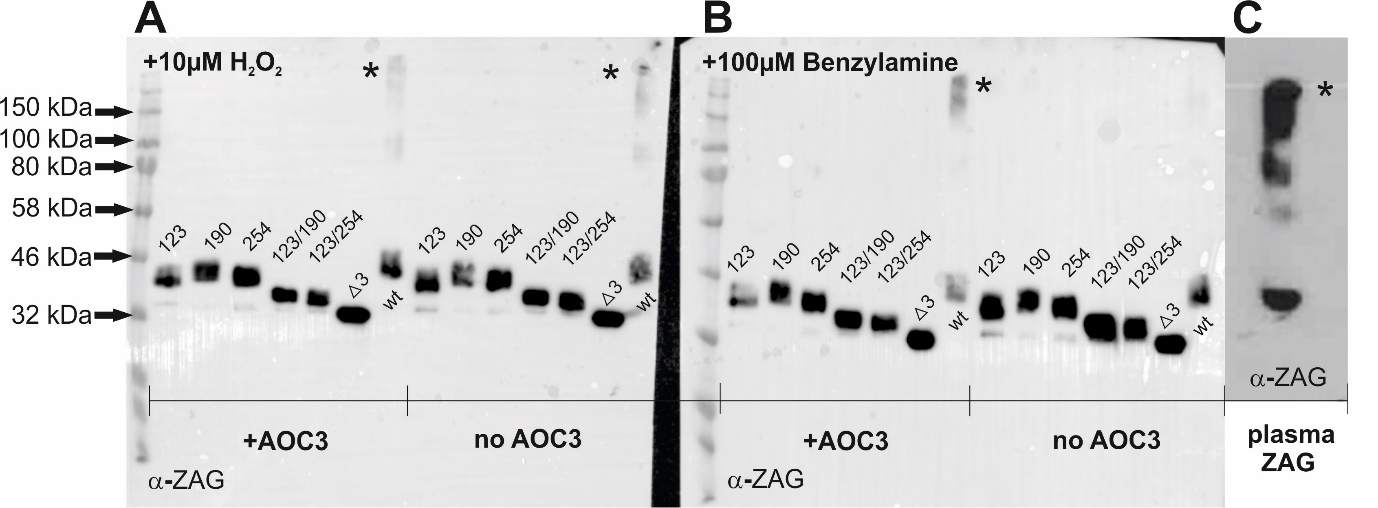
***
